# Supplementary material
Source: publisher figshare collection journal article supplement (https://osapublishing.figshare.com/ndownloader/files/31075900)
Supplement: Supplementary file 1 [file 31075900]

## Splicing exponential point spread function design for localization of nanoparticles: supplement

HANGFENG LI,<sup>1,2</sup>  FAMIN WANG,<sup>1,2</sup> XIN MIAO,<sup>2</sup> WEI HUANG,<sup>2</sup>   
YU CHENG,<sup>3</sup> YUN XIAO,<sup>2</sup> TONGDA WEI,<sup>2</sup> AND YUNHAI ZHANG<sup>2,\*</sup>

<sup>1</sup>*School of Biomedical Engineering (Suzhou), Division of Life Sciences and Medicine, University of Science and Technology of China, Hefei 230022, China*

<sup>2</sup>*Jiangsu Key Laboratory of Medical Optics, Suzhou Institute of Biomedical Engineering and Technology, Chinese Academy of Sciences, Suzhou 215163, China*

<sup>3</sup>*Department of Neurology, The First Hospital of Jilin University, Changchun, Jilin 130021, China*

\*[zhangyh@sibet.ac.cn](mailto:zhangyh@sibet.ac.cn)

---

This supplement published with Optica Publishing Group on 13 October 2021 by The Authors under the terms of the [Creative Commons Attribution 4.0 License](https://creativecommons.org/licenses/by/4.0/) in the format provided by the authors and unedited. Further distribution of this work must maintain attribution to the author(s) and the published article's title, journal citation, and DOI.

Supplement DOI: <https://doi.org/10.6084/m9.figshare.16750585>

Parent Article DOI: <https://doi.org/10.1364/OE.440721>

# Splicing exponential point spread function design for localization of nanoparticles: supplemental document

In the field of particle three-dimensional positioning, the Double-helix point spread function (DH-PSF) is often used, so we compare our SE-PSF with various DH-PSFs in supplementary materials. In comparison, we choose three different Double-helix point spread functions, as follows,

$2\pi$ -DH-PSF[1]. The  $2\pi$ -DH-PSF is based on the Fresnel zone design, and it can rotate by  $2\pi$  radians, which is twice the rotation angle of the conventional DH-PSF.

Distorted Grating And Double-Helix Point Spread Function Combination Microscopy (DDCM)[2]. DDCM is a method of combining distortion grating with DH-PSF, which can generate three main diffraction orders, and further expand the detectable axial range of DH-PSF.

Combined DH-PSF[3]. Clemens Roeder used a special optical system to combine two single-helix PSFs into a DH-PSF, which rotates the DH-PSF by  $2\pi$  radians

Under the same axial detection range ( $10\mu\text{m}$  in  $100\times$  microscopy imaging system,  $\text{NA}=1.4$ ,  $\lambda=514\text{nm}$ ), we compared the three-dimensional localization precision of the SE-PSF ( $\alpha=40$ ,  $\beta=0.35$ ), the  $2\pi$ -DH-PSF, the DDCM, and the Combined DH-PSF. In the calculation, we set the detected number of photons as 3000, set the average background noise  $B$  as 15, and add Gaussian noise and Poisson noise as interference.

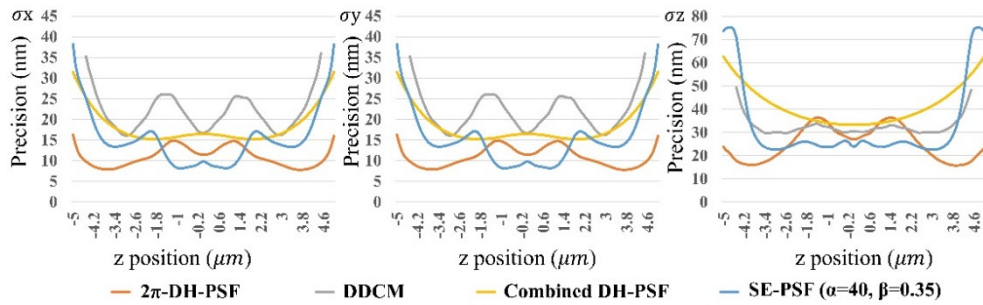

Fig. S1. Comparison of the localization precisions.

As shown in Fig. S1, the three-dimensional localization precisions of SE-PSF are significantly better than that of the DH-PSFs in the middle part, but at both ends, its three-dimensional localization precisions are lower than that of the  $2\pi$ -DH-PSF. Compared with the DDCM and the Combined DH-PSF, the SE-PSF performs better in three-dimensional localization precisions but has shortcomings in comparison with the  $2\pi$ -DH-PSF.

## References

1. H. Li, F. Wang, T. Wei, X. Miu, W. Huang, and Y. Zhang, "Particles 3D tracking with large axial depth by using the  $2\pi$ -DH-PSF," *Optics Letters* (2021)
2. H. Li, D. Chen, G. Xu, B. Yu, and H. Niu, "Three dimensional multi-molecule tracking in thick samples with extended depth-of-field," *Opt Express* 23, 787-794 (2015).
3. C. Roeder, A. Jesacher, S. Bernet, and M. Ritsch-Marte, "Axial super-localisation using rotating point spread functions shaped by polarisation-dependent phase modulation," *Optics Express* 22, 4029-4037 (2014).
